# Supplementary material for: A pirfenidone loaded spray dressing based on lyotropic liquid crystals for deep partial thickness burn treatment: healing promotion and scar prophylaxis
Source: Royal Society of Chemistry journal article supplement (doi:10.1039/c9tb02929j), 2020-01-01
Supplement: c9tb02929j1.pdf [file c9tb02929j1.pdf]

## 1 Supplementary Information

### 2 **Pirfenidone Loaded Spray Dressing Based on Lyotropic Liquid Crystal for Deep**

### 3 **Partial Thickness Burn Treatment: Healing Promotion and Scar Prophylaxis**

4 *Jintian Chen, Hui Wang, Liling Mei, Bei Wang, Ying Huang\*, Guilan Quan, Chao Lu,*

5 *Tingting Peng, Xin Pan\*, Chuanbin Wu*

6 J. T. Chen, H. Wang, L.L. Mei, B. Wang, Dr. C. Lu, Dr. X. Pan, Prof. C. B. Wu

7 School of Pharmaceutical Sciences

8 Sun Yat-Sen University

9 Guangzhou 510006, P. R. China

10 E-mail: [panxin2@mail.sysu.edu.cn](mailto:panxin2@mail.sysu.edu.cn)

11

12 Dr. Y. Huang, Dr. G.L. Quan, Dr. T.T. Peng, Prof. C. B. Wu

13 School of Pharmacy

14 Jinan University

15 Guangzhou 510632, P. R. China

16 E-mail: [huangy2007@163.com](mailto:huangy2007@163.com)

17

## 18 **1 Experimental section**

### 19 **1.1 Optimization of matrix and solvent**

20 GMO and DMAC was uniformly mixed at a ratio of 1:9 to 9:1 and then added to  
21 excessive water for observation of gel formation. GMO and DMAC ratio at 7:3, 8:2  
22 and 9:1 (LLC70, LLC80, LLC90) was able to form bulk gel in contact with water and  
23 selected for further optimization. In order to investigate the effect of water on the  
24 precursor, water was also added in a weight amount of 10% to the precursor (WLLC70,  
25 WLLC80, WLLC90). Rheological test was performed to thoroughly optimize the

formulation, including viscosity, yielding stress and viscoelasticity, using Kinexus Lab<sup>+</sup> Rheometer (Malvern, UK) in accordance to the testing sequence provided by rspace software (Malvern, UK). Specifically, shear rate was set from 0.1 to 100 s<sup>-1</sup> in viscosity test while shear stress ranged from 0 to 100 Pa·s in yielding stress test. For viscoelasticity test, amplitude sweep was adopted with a strain range from 0.1% to 100% and sweep frequency at 1 Hz. For complex modulus, the frequency and shear strain was fixed in 1 Hz and 1%. Single frequency test was also conducted with shear strain at 1%, frequency at 1 Hz and testing time at 300s.

## 1.2 HA addition

The matrix ratio of GMO: DMAC: water was chose at 72:18:10 (w/w). HA with various molecular weight (MW) and content was added to the matrix for thorough investigation and optimization through water absorption and rheological property. HA MW varied from 200~400 kD, 800~100 kD, 1300~1500 kD to 1800~2200 kD while HA content range was 0.1%, 0.5%, 1%, 2%, 3% and 5%.

Water absorption was conducted as followed. Around 0.5 g precursor was placed on the bottom of a 5 mL tube and 4 mL water was carefully added to the tube without scouring the precursor. The tube was placed at 37°C, 100 rpm in a shaker (THZ-82B, Jingda, China) and taken out to remove all the water at predetermined interval by tilting the tubes. Weight of sample and tube were recorded and the water absorption rate ( $R_{wu}$ ) was calculated according to the following equation:

$$R_{wu} = \frac{w_t - w_{ep} - w_p}{w_p}$$

Equation (S1)

47 where  $w_t$  is the total weight of tube and gel after water removal,  $w_{ep}$  is the weight  
48 of tube and  $w_p$  is the weight of the added LLC precursor.

### 49 **1.3 Drug release behavior**

50 The matrix ratio of GMO: DMAC: water was chose at 72:18:10 (w/w) according  
51 to previous study. HA with various molecular weight (MW) and content was added to  
52 the matrix for thorough drug release behavior. HA MW varied from 200~400 kD,  
53 800~100 kD, 1300~1500 kD to 1800~2200 kD while HA content range was 0.1%,  
54 0.5%, 1%, 2%, 3% and 5%. Different content of drug PFD (0.5%, 1%, 1.5%, 2% and  
55 3%) was also loaded into the precursor and the drug release behavior was investigated.  
56 Moreover, complex modulus of HA solution, LLC matrix and HA contained LLC  
57 matrix at different HA (800~1000 kD) content was also evaluated.

58 Drug release was conducted using dialysis bag method. Approximately 0.4 g  
59 HLCSO precursor was added to dialysis bag (cut-off MW, 3500 D, Jinsui Bio-  
60 Technology Co. Ltd, Shanghai, China) and placed in a tube filled with 10 mL PBS  
61 solution as drug release medium. The tube was placed in a shaker at 37°C, 100 rpm. At  
62 predetermined interval 1 mL drug release medium was withdrawn and subjected to  
63 HPLC to detect the released drug amount. The tube was supplemented with equivalent  
64 medium. HPLC (UltiMate3000, Dionex, Sunnyvale, CA, USA) was performed using a  
65 InertSustain C18 column (4.6 inner diameter x150 mm length, GL Sciences, Japan)  
66 under the following conditions: wavelength: 317 nm, mobile phase: 0.02 M  $\text{KH}_2\text{PO}_4$  :  
67 acetonitrile (V/V), flow speed: 20  $\mu\text{L}/\text{min}$ . Cumulative drug release was calculated and

68 plot as a function of time.

69 The release kinetics curves of different were fitted in models including zero order  
70 ( $y = kt + a$ ), first order ( $\ln(100-y) = kt + a$ ), Higuchi ( $y = kt^{1/2} + a$ ), Hixon Crowell  
71 ( $((100-y)^{1/3} = kt + a)$  and ritger pepper ( $y = kt^n$ ) model, where  $y$  is the drug release at  
72 time  $t$ ,  $a$  and  $n$  are constants, and  $K$  is the drug release rate coefficient. The correlation  
73 coefficient  $R^2$  between each discrete release point and the fitted curve was determined  
74 to infer possible drug release mechanism.

## 75 **2. Result and discussion**

### 76 **2.1 Optimization of matrix and solvent**

77 GMO and DMAC mixed at a ratio of 1:9 to 9:1 demonstrated different ability for  
78 gel formation. When contacting excessive water, GMO and DMAC at a ratio from 1:9  
79 to 4:6 showed no phase transition. When the ratio increase to 5:5 and 6:4, incomplete  
80 gel formation can be observed instantly with white floccules or cluster in morphology.  
81 GMO and DMAC mixed at ratio from 7:3 to 9:1 showed instant transition in contact  
82 with water and formed transparent bulk gel. Hence, these ratios were selected for further  
83 optimization.

84 The further optimization of GMO and DMAC ratio was conducted through  
85 rheological assessment. The viscosity of LLC was all shear thinning, which indicated  
86 the pseudoplastic property. When exterior force was applied to the precursor and the  
87 shear rate rose drastically, the viscosity would sharply descend accordingly and thus  
88 facilitated the spray process. Viscosity of LLC90 (Figure S1C) was one order

89 magnitude higher than that of LLC70 (Figure S1A) and LLC80 (Figure S1B) due to the  
 90 higher percentage of GMO. Water addition to LLC cause different changes to LLC. For  
 91 LLC70 and 80, the high content of DMAC ensure a complete mixture of matrix and  
 92 solvent, which disperse the water uniformly and cause slight change on the shear-  
 93 thinning viscosity. For LLC90. GMO has composed the majority of matrix hence the  
 94 introduction of water had no influence on the shear thinning property.

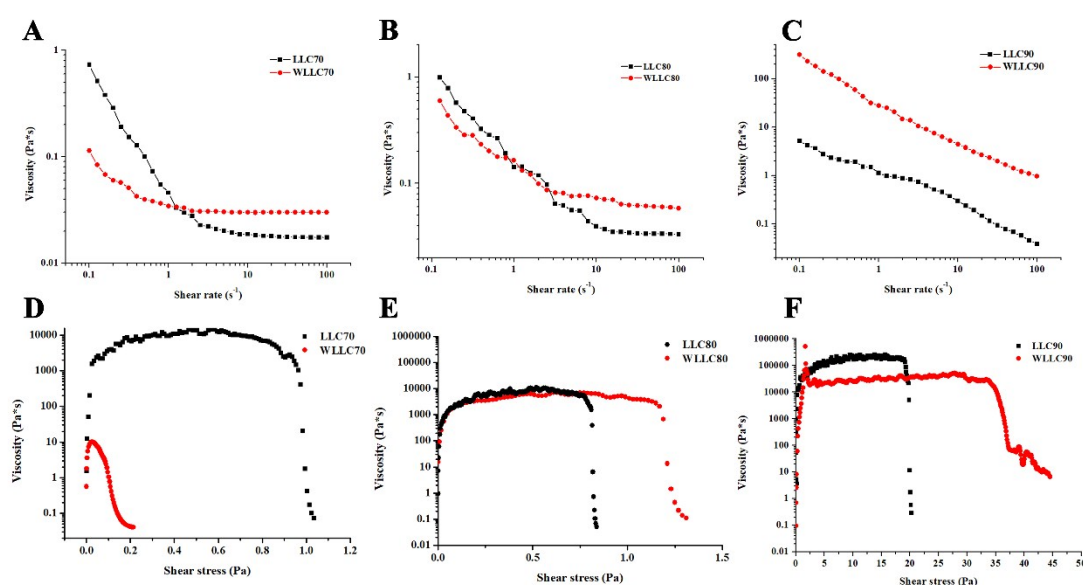

96 **Figure S1.** Rheological property of LLC spray dressing precursor with different  
 97 composition. A,B,C viscosity; D,E,F, yielding stress.

98  
 99 Yield stress is defined as the critical stress applied to non-Newtonian fluid where  
 100 it tends to flow while still remains the original state. The viscosity is in a relatively high  
 101 level and the deformation was barely seen. Once the stress passes the critical value, the  
 102 fluid starts to flow and the viscosity will decrease vigorously. It could be regarded as  
 103 an indicator for the fluidity of the precursor to assess the spray feasibility. The yield  
 104 stress of LLC70 (Figure S1D) and LLC80 (Figure S1E) was rather small compared with

105 LLC90 due to their smaller GMO amount (Figure S1F). Water addition to the matrix  
106 would cause mild fluctuation to the yield stress considering the different formulation  
107 composition. For LLC70, the large amount of DMAC ensure a sufficient mixture of the  
108 aqueous phase and lipid phase once water was added, so the fluidity was improved. As  
109 GMO ratio increased in the matrix, it became more difficult for the added water to fully  
110 disperse into the matrix and thus the yield stress for the precursor would rise. For  
111 LLC80, the yield stress was around 1 Pa·s, which was close to LLC70 and in favor of  
112 the precursor spray. Meanwhile, yield stress of LLC90 grew to over 30 Pa·s,  
113 significantly hinder the application of precursor as spray dressing. The result was in  
114 agreement with that of viscosity test, reflecting the ability to flow in the state of  
115 precursor.

116       Viscoelasticity test was performed to evaluate the solid-liquid state and property  
117 of the precursor since it was non-Newton liquid with both feature. The complex  
118 modulus under different shear strain was an indicator hardness which could be  
119 decomposed into elastic modulus ( $G'$ ) and viscous modulus ( $G''$ ). When the value of  $G'$   
120 surpasses  $G''$  and the phase angle was smaller than  $45^\circ$ , the dominant state of the fluid  
121 is regarded to be solid, and liquid versa. Viscosity could be referred as an indicator of  
122 the fluid state under different exterior condition.

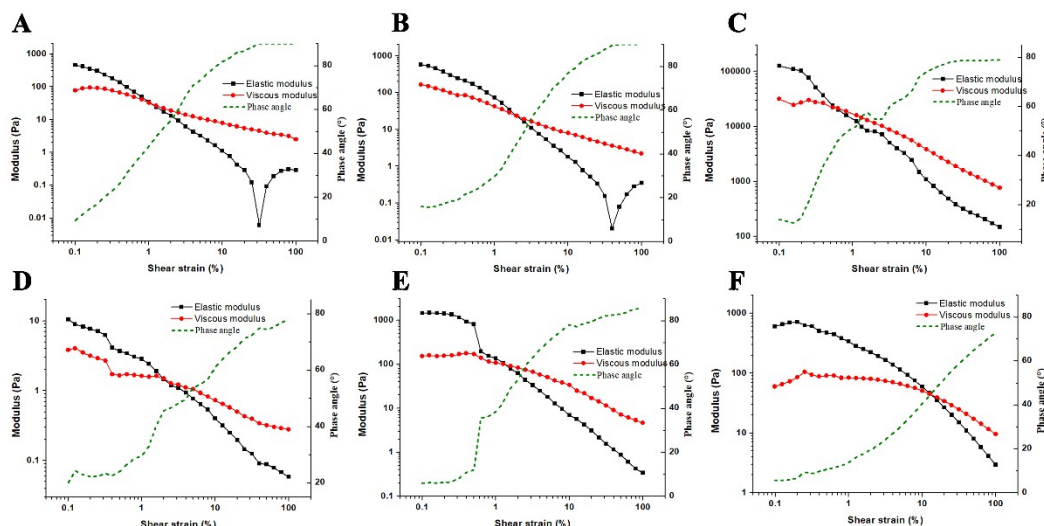

123

124 **Figure S2.** Rheological property of LLC spray dressing precursor with different  
 125 composition. A,B,C, viscoelasticity test results of LLC70 (A), LLC 80 (B) and LLC90  
 126 (C); D,E,F, viscoelasticity test results of of WLLC70 (D), WLLC 80 (E) and WLLC90  
 127 (F).

128 Precursor of both LLC70 (Figure S2A) and LLC80 (Figure S2B) showed large  
 129 modulus close to  $10^2 \sim 10^3$  Pa at low shear strain area. The dominant solid state ensure  
 130 stability to cling to the wound surface at a relevant still condition after spraying to the  
 131 lesion. As the shear strain increased, the modulus gradually decreased to  $10^0$  Pa and was  
 132 mainly in liquid state with excellent fluidity. Water addition barely or slightly decreased  
 133 the modulus (Figure S2D, 2E). LLC90 showed similar trend yet the modulus with or  
 134 without water was significantly larger than others due to high GMO amount, which  
 135 might impede the application (Figure S2C, 2F).

136 Single frequency test was a type of viscoelasticity test in which temperature, sweep  
 137 frequency and shear strain was fixed. Resulted modulus was recorded as a function of  
 138 time and the property changes was caused merely due to the inner structure. The result  
 139 of pure GMO showed constantly increase on both elastic and viscous modulus as high  
 140 as  $10^5$  Pa, due to the spontaneous solidification process of unsaturated lipid. The

141 solidification required heat to restore to liquid, which was of much incomppliance.

142 Owing to this property of GMO, LLC 70 (Figure S3A), LLC80 (Figure S3B) and

143 LLC90 (Figure S3C) all demonstrated significant solidification process, featuring

144 growing complex modulus, as well as elastic modulus surpassing viscous modulus. The

145 addition of water could postpone or curb this process to some extent, by drastically

146 decreasing the modulus or maintain the elastic modulus at a higher level than viscous

147 modulus (Figure S3D, 3E, 3F). WLLC80 was finally selected as the optimized

148 formulation (GMO: DMAC: water = 72:18:10) due to the low viscosity and yield stress,

149 dominant liquid state and relatively small amount of organic solvent.

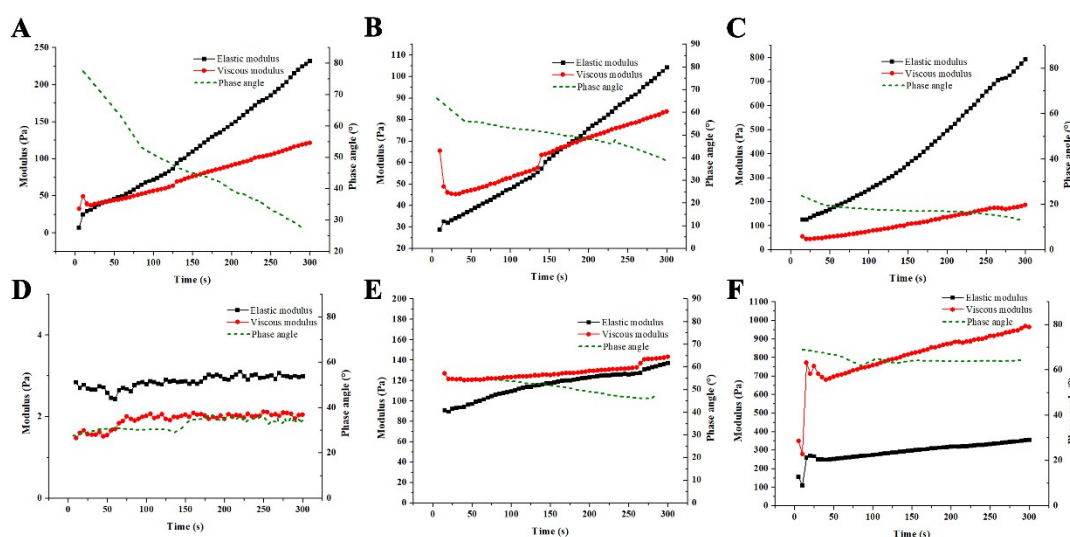

150

151 **Figure S3.** Rheological property of LLC spray dressing precursor with different  
 152 composition. A,B,C single frequency test results of LLC70 (A), LLC 80 (B) and LLC90  
 153 (C); D,E,F, single frequency test results of WLLC70 (D), WLLC 80 (E) and WLLC90  
 154 (F).

## 155 2.2 HA addition

156 The water absorption result was shown in Figure S4. Pure LLC showed weak

157 water absorption ability. Addition of HA to LLC matrix (HLCSD) significantly

158 increase water absorption. The addition of HA improved the water absorption capacity,  
159 indicating a superior exudates absorption ability than pure LLC to create a favorable  
160 environment for wound healing. In terms of the molecular weight, low molecular  
161 weight HA (LMWHA, 200~400 kD) showed weak improvement in water absorption,  
162 with bare increase only when the content exceeded 1% due to the weak hydroscopicity  
163 and short chain of LMWHA. Medium molecular weight HA (MMWHA, 800~1000 kD,  
164 1300~1500 kD) and high molecular weight HA (HMWHA, 1800~2200 kD)  
165 significantly enhanced the absorption capacity from 100% to 260%.

166 Pure LLC matrix showed weak capacity in water absorption. The contact area of  
167 precursor and medium was controlled to better mimic the physiological contact of  
168 dressing and wound during application, which limited a comprehensive contact. The  
169 erosion by medium scouring would cause loss of gel, simulating the possible exterior  
170 abrasion after administration. The improvement with HA addition may result from  
171 strong hydroscopicity and long molecular chain of HA. HA molecule itself possessed  
172 great capacity to absorb water and swell with large volume, while the long molecular  
173 chain of HA could maintain the integrity of the lattice structure by binding adjacent unit  
174 and reduce the gel loss by resisting the medium scouring. Together the water absorption  
175 ability was remarkably enhanced. Compared with 800~1000 kD, MW of 1300~1500  
176 kD and 1800~2200 kD did not significantly affected the water absorption, indicating a  
177 saturation of MW effect on water absorption.

178

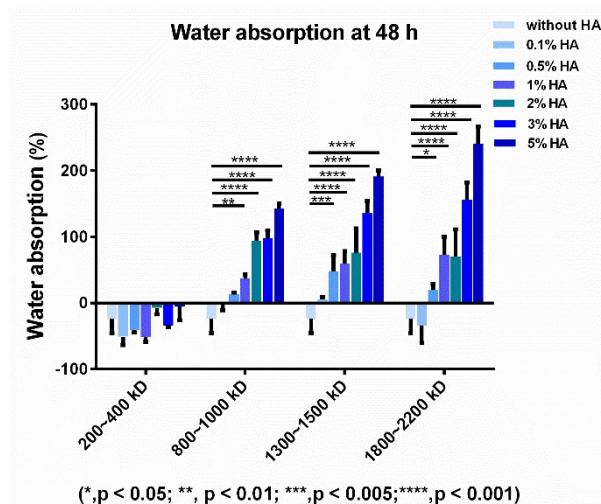

179

180 **Figure S4.** HLCSD water absorption at 48 h with HA of various MW and  
181 concentration.

182 Rheological assessment was conducted to investigate the influence of HA addition  
183 to LLC matrix. Ideal spray dressing for wound management should be equipped with  
184 low viscosity as precursor and robust modulus as gel. Low viscosity could provide  
185 convenience during administration and facilitate the spray process while moderate  
186 modulus of gel could serve as a protection for wound from stress and shock.

187 HA addition of different MW raised the viscosity by 1~5 magnitudes, yet the shear  
188 thinning property was still maintained. During spray the stress applied to the precursor  
189 may cause a shear rate as high as  $10^2$  to  $10^4$   $s^{-1}$ , which could drastically decrease the  
190 viscosity of the precursor according to the viscosity/shear rate curves. As the result  
191 showed, formulation with HA MW at 1300~1500 kD (Figure S5C) or 1800~2200 kD  
192 (Figure S5D) demonstrated a viscosity higher than that of the HA free formulation due  
193 to the addition of large MW HA. The high shear rate viscosity of formulation with HA  
194 MW at 800~1000 kD restored closely to the HA free formulation, indicating a potential  
195 for further study as the precursor of LLC spray dressing (Figure S5B).

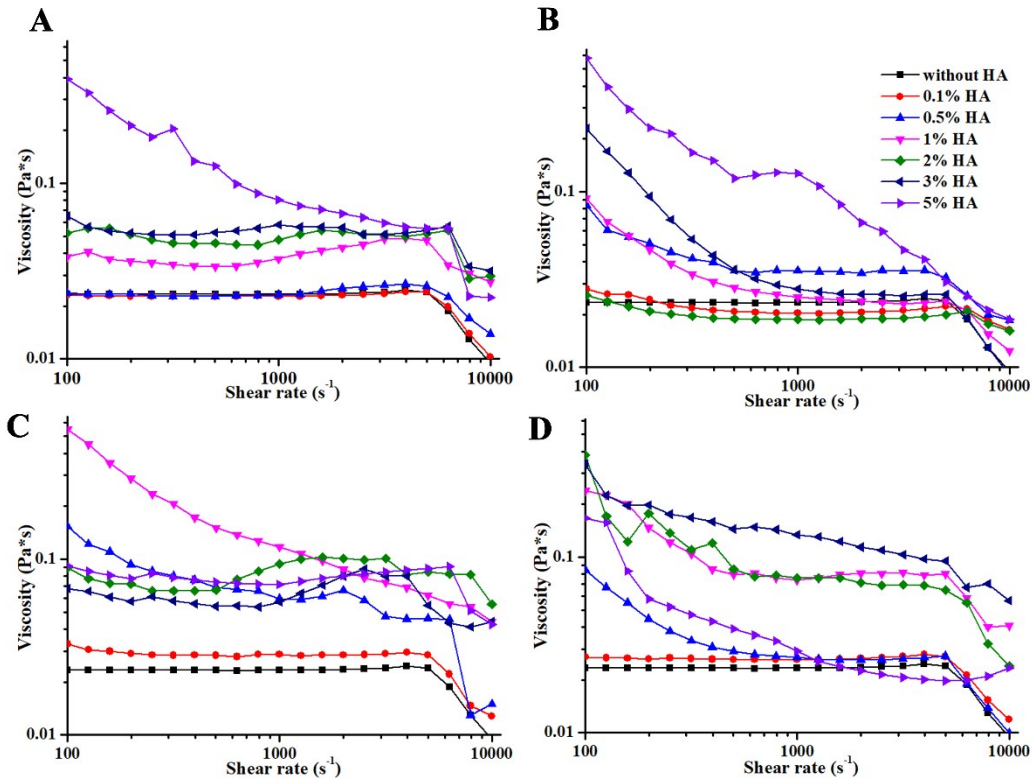

196

197 **Figure S5.** Precursor viscosity with shear rate ranging from  $10^2 \sim 10^4 \text{ s}^{-1}$  with HA MW  
 198 at 200~400 kD (A), 800~1000 kD (B), 1300~1500 kD (C) and 1800~2200 kD (D).

199 Another rheological property of HLCSD worth concerning was the gel modulus

200 which measured the stiffness or resistance to elastic deformation under load. Ideal

201 dressing should possess appropriate modulus (skin modulus  $10^0 \sim 10^3 \text{ kPa}$ ) to protect the

202 skin from damage of exterior abrasion and force yet not to cause discomfort to patients.

203 HLCSD gel modulus with different HA content was shown is Figure S6A. Pure LLC

204 without HA showed low modulus at round 1kPa and addition of HA significantly

205 increased the modulus value. The effect of 200~400 kD was limited. For 800~1000 kD

206 HA, the modulus tended to increase as the HA concentration rose. However, some

207 modulus decreased in groups with HA MW over 1300 kD, possibly due to the reason

208 that the excessive swelling of HA loosened and broke the integral structure of LLC gel.

209 Addition of 800~1000 kD HA ensured a stable enhancement to modulus which was

210 similar to that of skin. It could not only enable the LLC gel to resist exterior force but  
 211 also bring compliance to patients after administration.

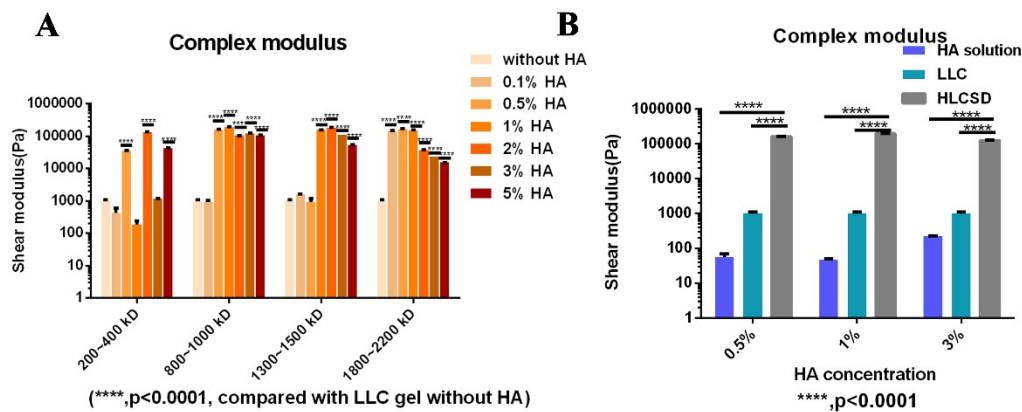

212  
 213 **Figure S6.** A. Complex modulus of HLCSD gel with different HA; B, Modulus of HA  
 214 solution, LLC dressing and HLCSD dressing at different HA (MW 800~1000 kD)  
 215 content.

216

217 Complex modulus of HA solution, LLC and HLCSD at different HA (800~1000  
 218 kD) content was evaluated to briefly compare their individual and combined modulus.  
 219 The results showed that both individual HA and LLC matrix possessed low modulus at  
 220 approximately 0.1-1 kPa. However, after HA addition into LLC matrix (HLCSD), the  
 221 combination of HA with LLC in HLCSD demonstrated modulus 2-3 magnitude higher  
 222 than pure HA solution or LLC matrix without HA (Figure S6B), which indicated a  
 223 robust crystal structure with modulus similar to normal skin. It could be inferred that  
 224 the addition of HA strengthen the lattice structure formed by LLC self-assemble and  
 225 increase gel modulus. The molecular chain of HA may insert into the bicontinuous lipid  
 226 layer of LLC and bind the adjacent unit to maintain the integrity of lattice structure.  
 227 Hence the modulus was strengthened and enhanced with the combination of HA and  
 228 LLC. The result further necessitated the integration of HA into LLC precursor in this

229 study.

230

### 231 **2.3 Drug release behavior**

232 The drug release behavior of formulation with different HA content was shown in  
233 Figure S7A. PFD was released from HLCSD mainly through diffusion. The size of  
234 water channels in HLCSD allowed a quick and complete diffusion of the water-soluble  
235 PFD.<sup>1</sup> Of note, the diffusion of PFD could be significantly affected by the medium  
236 exchange rate.<sup>2</sup> Therefore, the dialysis bag method with 10 mL release medium at 100  
237 rpm was adopted to restrict the medium exchange rate in the *in vitro* drug release  
238 investigation for the simulation of *in vivo* conditions.

239 It was worth mentioning that the tissue fluid exchange on the wound was much  
240 slower. Therefore, the rapid drug release in the early stage in the *in vitro* drug release  
241 investigation probably resulted in a prolonged drug release with a longer retention on  
242 the wound *in vivo*. This in turn provided a long-acting regulation of collagen synthesis  
243 and further control of scar formation, with a consecutive dressing replacement every  
244 two days. Further study will be conducted to optimize the method of the *in vitro* drug  
245 release.

246 The effect of HLCSD composition on drug release was well investigated. The  
247 addition of HA to LLC precursor appeared to have insignificant effect on drug release  
248 rate and extent. Instant release of drug was achieved in 48 h. The enhanced water  
249 absorption in phase transition could enlarge water channel and thus facilitate drug

diffusion through the water channel of LLC. Moreover, HA molecular inserted into the LLC lipid bilayer may bond the adjacent lattice and make the structure more compact, which is against the drug release from the system. It may be the neutralization of these two effect that make the drug release behavior barely affected by HA addition. Different drug loading from 0.5% to 3% (w/w) also showed no significantly difference on drug release indicating that drug content at this range was far from saturation and hardly had an impact on drug release behavior (**Figure S7B**).

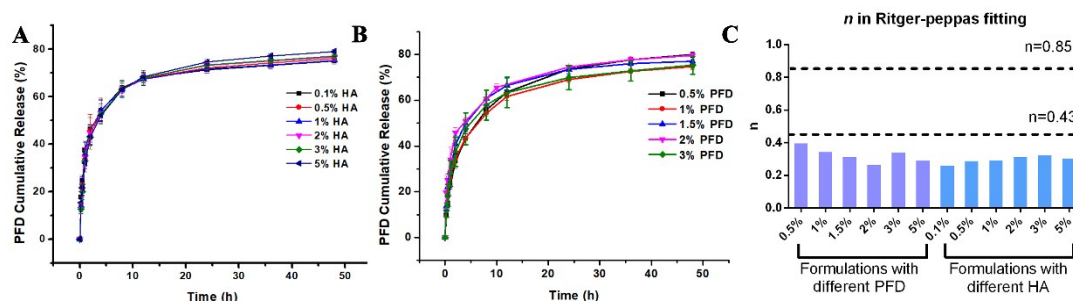

**Figure S7.** A, PFD release behavior from HLCSD with various HA content (MW 800~1000 kD); B, PFD release behavior from HLCSD with various drug loading. C,  $n$  value of the fitted Ritger-peppas model from different curves.

As shown by the results, different drug loading from 0.5% to 3% (w/w) had no significantly difference on drug release. According to the results of the cell experiment in manuscript, PFD showed obvious proliferation inhibitory effect over 500  $\mu\text{g/mL}$  (for HSFb) or 1000  $\mu\text{g/mL}$  (for HaCat). For the sake of safety, the PFD content was determined at a lower level. Considering the volume of exudation on wound,<sup>3</sup> 10-fold dilution of PFD was reasonably anticipated during the administration of 100  $\mu\text{L}$  HLCSD precursor. For HLCSD with 0.5% PFD (5000  $\mu\text{g/mL}$ ), the exposure of PFD to wound could be controlled to be less than 500  $\mu\text{g/mL}$ , which was regarded biocompatible. For higher PFD content, the exposure concentration was hard to control.

Biocompatible experiment indicated that the administration of HLCSD with 0.5% PFD showed no inhibitory effect to in the model rat. This dosage of administration was also proved efficient by VSS score and immunohistochemical analysis for scar prophylaxis in the pharmacodynamics study. Therefore, PFD content at 0.5% was appropriate and chosen for scar prophylaxis.

The fitting results of drug release curves showed that PFD release from HLCSD could be best fitted in Ritger-peppas model. Further investigation of index  $n$  demonstrated that the loading of PFD or addition of HA did not significantly change the release behavior.  $n$  value ( $n < 0.43$ ) indicated that PFD was released from lyotropic liquid crystal structure through Fick diffusion (Figure S7C).

Table S1. PFD release curve fitting in formulation with different PFD

| R <sup>2</sup> | 0.5%<br>PFD | 1%<br>PFD | 1.5%<br>PFD | 2%<br>PFD | 3%<br>PFD | 5%<br>PFD |
|----------------|-------------|-----------|-------------|-----------|-----------|-----------|
| Zero-order     | 0.7331      | 0.7138    | 0.6593      | 0.6867    | 0.6543    | 0.6184    |
| First-order    | 0.8689      | 0.8328    | 0.7881      | 0.829     | 0.7837    | 0.7192    |
| Higuchi        | 0.9045      | 0.8904    | 0.8496      | 0.8668    | 0.8436    | 0.8103    |
| Hixson crowell | 0.8265      | 0.7948    | 0.7465      | 0.784     | 0.7414    | 0.6859    |
| Ritger-peppas  | 0.9562      | 0.9541    | 0.9361      | 0.9554    | 0.9288    | 0.9046    |

281

Table S2. PFD release curve fitting in formulation with different HA

| R <sup>2</sup> | 0.1% HA | 0.5% HA | 1%<br>HA | 2%<br>HA | 3%<br>HA | 5%<br>HA |
|----------------|---------|---------|----------|----------|----------|----------|
| Zero-order     | 0.5861  | 0.5946  | 0.5858   | 0.6023   | 0.609    | 0.6469   |
| First-order    | 0.7087  | 0.7254  | 0.7152   | 0.7406   | 0.745    | 0.788    |

---

|                |        |        |        |        |        |        |
|----------------|--------|--------|--------|--------|--------|--------|
| Higuchi        | 0.7852 | 0.7931 | 0.7847 | 0.7994 | 0.8066 | 0.8386 |
| Hixson crowell | 0.6681 | 0.6819 | 0.6724 | 0.6953 | 0.7003 | 0.742  |
| Ritger-peppas  | 0.905  | 0.9033 | 0.888  | 0.8894 | 0.8997 | 0.9328 |

---

## 283 Reference

- 284 1. R. Dorati, J. L. Medina, P. P. DeLuca and K. P. Leung, *AAPS PharmSciTech*, 2018, **19**,  
285 2264-2275.
- 286 2. J. Siepmann and F. Siepmann, *Journal of Controlled Release*, 2012, **161**, 351-362.
- 287 3. K. Vowden and P. Vowden, *British journal of community nursing*, 2003, **8**, 4-13.

288
